# Supplementary material for: Spin-crossover in an iron(iii) complex showing a broad thermal hysteresis
Source: Royal Society of Chemistry journal article supplement (doi:10.1039/d0dt03610b), 2020-12-10
Supplement: d0dt03610b1.pdf [file d0dt03610b1.pdf]

*Spin-crossover in iron(III) complex showing a broad thermal hysteresis*

Cyril Rajnák, Romana Mičová, Ján Moncol, Ľubor Dlháň, Christoph Krüger, Franz Renz, Roman Boča S1

---

**Supplementary Information**

Spin-crossover in iron(III) complex showing a broad thermal hysteresis

Cyril Rajnák <sup>a</sup>, Romana Mičová <sup>a</sup>, Ján Moncol <sup>b</sup>, Ľubor Dlháň <sup>b</sup>, Christoph Krüger <sup>c</sup>, Franz Renz <sup>c</sup>, Roman Boča <sup>a</sup>

<sup>a</sup> *Department of Chemistry, Faculty of Natural Sciences, University of SS Cyril and Methodius, 91701 Trnava, Slovakia,*

<sup>b</sup> *Institute of Inorganic Chemistry, FCHPT, Slovak University of Technology 81237 Bratislava, Slovakia*

<sup>c</sup> *Institute of Inorganic Chemistry, Leibniz University Hannover, 30167 Hannover, Germany*

---

**Abbreviations**

[Fe(<sup>3,5</sup>Cl-L)Cl], (**1a**), C<sub>19</sub>H<sub>17</sub>FeN<sub>3</sub>O<sub>2</sub>Cl<sub>5</sub>

[Fe(<sup>3,5</sup>Cl-L)(N<sub>3</sub>)] (**1b**), C<sub>19</sub>H<sub>17</sub>FeN<sub>6</sub>O<sub>2</sub>Cl<sub>4</sub>

[Fe(<sup>3,5</sup>Cl-L)(NCS)], (**1c**), C<sub>20</sub>H<sub>17</sub>FeN<sub>4</sub>O<sub>2</sub>Cl<sub>4</sub>S

[Fe(<sup>3,5</sup>Cl-L)(NCSe)], (**1d**), C<sub>20</sub>H<sub>17</sub>FeN<sub>4</sub>O<sub>2</sub>Cl<sub>4</sub>Se

[Fe(<sup>3,5</sup>Br-L)Cl], (**2a**), C<sub>19</sub>H<sub>17</sub>FeN<sub>3</sub>O<sub>2</sub>ClBr<sub>4</sub>

[Fe(<sup>3,5</sup>Br-L)(N<sub>3</sub>)], (**2b**), C<sub>19</sub>H<sub>17</sub>FeN<sub>6</sub>O<sub>2</sub>Br<sub>4</sub>

[Fe(<sup>3,5</sup>Br-L)(NCS)], (**2c**), C<sub>20</sub>H<sub>17</sub>FeN<sub>4</sub>O<sub>2</sub>Br<sub>4</sub>S

[Fe(<sup>3,5</sup>Br-L)(NCSe)], (**2d**), C<sub>20</sub>H<sub>17</sub>FeN<sub>4</sub>O<sub>2</sub>Br<sub>4</sub>Se

### Synthesis of $[\text{Fe}^{(3,5)\text{X-L}}(\text{Cl})]$ type precursors

N-(2-aminoethyl)-1,3-propanediamine (10 mmol) and 3,5-dichlorosalicylaldehyde and/or 3,5-dibromosalicylaldehyde (20 mmol) were dissolved in 120 cm<sup>3</sup> of methanol. The solution was stirred and heated under reflux for 15 min,  $\text{FeCl}_3 \cdot 6\text{H}_2\text{O}$  (10 mmol) in 25 cm<sup>3</sup> methanol was added and further stirred and heated under reflux for 1 h. After cooling to -18 Celsius for 24 h, black microcrystalline product was filtered off and dried at room temperature. The reaction scheme is shown in Fig. S1.

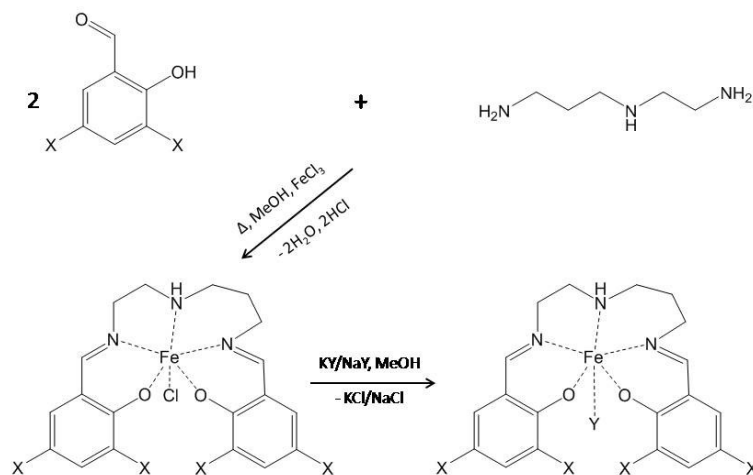

**Fig. S1.** Sketch of the pentadentate ligands 3,5-Cl-salpet, 3,5-Br-salpet ( $\text{X} = \text{Cl}$  or  $\text{Br}$ ) and their complexes  $[\text{Fe}^{(3,5)\text{X-L}}(\text{Y})]$  ( $\text{Y} = \text{N}_3^-$ ,  $\text{NCS}^-$  and  $\text{NCSe}^-$ ).

Data for  $[\text{Fe}^{(3,5)\text{Cl-L}}(\text{Cl})]$ , (**1a**).  $\text{C}_{19}\text{H}_{17}\text{FeN}_3\text{O}_2\text{Cl}_5$  yield 4.2 g (76 %), ( $M = 552.48 \text{ g mol}^{-1}$ ) Calculated: C, 41.3 %; H, 3.10 %; N, 7.6 %. Found: C, 41.0 %; H, 3.05 %; N, 7.5 %; ESI-MS:  $[\text{Fe}^{(3,5)\text{Cl-L}}]^+$ : Calculated = 516.94  $\text{g mol}^{-1}$ ; Found: 516.90  $\text{g mol}^{-1}$ . IR:  $\nu(\text{N-H}) = 3260 \text{ cm}^{-1}$ ,  $\nu(\text{C-H}) = 2901 \text{ cm}^{-1}$ ,  $\nu(\text{C=N}) = 1638, 1610 \text{ cm}^{-1}$ .

Data for  $[\text{Fe}^{(3,5)\text{Br-L}}(\text{Cl})]$ , (**2a**).  $\text{C}_{19}\text{H}_{17}\text{FeN}_3\text{O}_2\text{ClBr}_4$  yield 3.72 g (51 %), ( $M = 730.28 \text{ g mol}^{-1}$ ) Calculated: C, 31.3 %; H, 2.35 %; N, 5.8 %. Found: C, 31.4 %; H, 2.44 %; N, 5.6 %. ESI-MS:  $[\text{Fe}^{(3,5)\text{Br-L}}]^+$ : Calculated = 694.74  $\text{g mol}^{-1}$ ; Found: 694.68  $\text{g mol}^{-1}$ . IR:  $\nu(\text{N-H}) = 3050 \text{ cm}^{-1}$ ,  $\nu(\text{C=N}) = 1633, 1609 \text{ cm}^{-1}$ .

### Synthesis of $[\text{Fe}^{(3,5)\text{X-L}}(\text{Y})]$ complexes

Pseudohalide salt  $\text{KY}$  or  $\text{NaN}_3$  (0.42 mmol) was dissolved in 30 cm<sup>3</sup> methanol and added to a solution of  $[\text{Fe}^{(3,5)\text{X-L}}(\text{Cl})]$  (0.4 mmol) in 100 cm<sup>3</sup> methanol. The mixture was stirred in an ultrasonic bath for 5 min. and filtered by a paper filter afterwards.

Data for  $[\text{Fe}^{(3,5)\text{Cl-L}}(\text{N}_3)]$  (**1b**).  $\text{C}_{19}\text{H}_{17}\text{FeN}_6\text{O}_2\text{Cl}_4$  yield 0.19 g (83 %), ( $M = 559.03 \text{ g mol}^{-1}$ ) Calculated: C, 40.8 %; H, 3.07 %; N, 15.0 %. Found: C, 40.8 %; H, 2.96 %; N, 14.9 %. IR (Tr):  $\nu(\text{N-H}) = 3244 \text{ cm}^{-1}$ ,  $\nu(\text{C-H}) = 2903 \text{ cm}^{-1}$ ,  $\nu(\text{N}_3) = 2085 \text{ cm}^{-1}$ ,  $\nu(\text{C=N}) = 1632, 1610 \text{ cm}^{-1}$ .

Data for  $[\text{Fe}^{(3,5)\text{Cl-L}}(\text{NCS})]$ , (**1c**).  $\text{C}_{20}\text{H}_{17}\text{FeN}_4\text{O}_2\text{Cl}_4\text{S}$  yield 0.2 g (85 %), ( $M = 575.11 \text{ g mol}^{-1}$ ) Calculated: C, 41.8 %; H, 2.98 %; N, 9.7 %. Found: C, 41.5 %; H, 2.91 %; N, 9.6 %. IR (Tr):  $\nu(\text{N-H}) = 3265 \text{ cm}^{-1}$ ,  $\nu(\text{C-H}) = 2902 \text{ cm}^{-1}$ ,  $\nu(\text{NCS}) = 2036 \text{ cm}^{-1}$ ,  $\nu(\text{C=N}) = 1639, 1618 \text{ cm}^{-1}$ .

Data for  $[\text{Fe}^{(3,5)\text{Cl-L}}(\text{NCSe})]$ , (**1d**).  $\text{C}_{20}\text{H}_{17}\text{FeN}_4\text{O}_2\text{Cl}_4\text{Se}$  yield 0.2 g (82 %), ( $M = 621.99 \text{ g mol}^{-1}$ ) Calculated: C, 38.6 %; H, 2.75 %; N, 9.0 %. Found: C, 38.7 %; H, 2.64; N, 9.0 %. IR (Tr):  $\nu(\text{N-H}) = 3266 \text{ cm}^{-1}$ ,  $\nu(\text{C-H}) = 2904 \text{ cm}^{-1}$ ,  $\nu(\text{NCSe}) = 2037 \text{ cm}^{-1}$ ,  $\nu(\text{C=N}) = 1640, 1619 \text{ cm}^{-1}$ . The single crystals were obtained by slow evaporation of the mother liquor at room temperature after couple of days.

Data for  $[\text{Fe}^{(3,5)\text{Br-L}}(\text{N}_3)]$ , (**2b**).  $\text{C}_{19}\text{H}_{17}\text{FeN}_6\text{O}_2\text{Br}_4$  yield 0.13 g (44 %), ( $M = 736.85 \text{ g mol}^{-1}$ ) Calculated: C, 31.0 %; H, 2.33 %; N, 11.4 %. Found: C, 30.9 %; H, 2.41 %; N, 11.4 %. IR (Tr):  $\nu(\text{N-H}) = 3241 \text{ cm}^{-1}$ ,  $\nu(\text{C-H}) = 2928 \text{ cm}^{-1}$ ,  $\nu(\text{N}_3) = 2084 \text{ cm}^{-1}$ ,  $\nu(\text{C=N}) = 1631, 1609 \text{ cm}^{-1}$ .

Data for  $[\text{Fe}^{(3,5)\text{Br-L}}(\text{NCS})]$ , (**2c**).  $\text{C}_{20}\text{H}_{17}\text{FeN}_4\text{O}_2\text{Br}_4\text{S}$  yield 0.13 g (42 %), ( $M = 752.91 \text{ g mol}^{-1}$ ) Calculated: C, 31.9 %; H, 2.28 %; N, 7.4 %. Found: C, 31.5 %; H, 2.23 %; N, 7.0 %. IR (Tr):  $\nu(\text{N-H}) = 3243 \text{ cm}^{-1}$ ,  $\nu(\text{C-H}) = 2926 \text{ cm}^{-1}$ ,  $\nu(\text{NCS}) = 2036 \text{ cm}^{-1}$ ,  $\nu(\text{C=N}) = 1637, 1616 \text{ cm}^{-1}$ .

Data for  $[\text{Fe}^{(3,5)\text{Br-L}}(\text{NCSe})]$ , (**2d**).  $\text{C}_{20}\text{H}_{17}\text{FeN}_4\text{O}_2\text{Br}_4\text{Se}$  yield 0.13 g (40 %), ( $M = 799.80 \text{ g mol}^{-1}$ ) Calculated: C, 30.0 %; H, 2.14 %; N, 7.0 %. Found: C, 30.3 %; H, 2.18 %; N, 6.5 %. IR (Tr):  $\nu(\text{N-H}) = 3246 \text{ cm}^{-1}$ ,  $\nu(\text{C-H}) = 2909 \text{ cm}^{-1}$ ,  $\nu(\text{NCSe}) = 2038 \text{ cm}^{-1}$ ,  $\nu(\text{C=N}) = 1637, 1616 \text{ cm}^{-1}$ .

**Table S1.** Crystallographic data for compounds **1a** and **1d**.

|                                                             | <b>1a</b>                                                                       | <b>1d</b>                                                                          | <b>1d'</b>                                                                         |
|-------------------------------------------------------------|---------------------------------------------------------------------------------|------------------------------------------------------------------------------------|------------------------------------------------------------------------------------|
| Chemical formula                                            | C <sub>19</sub> H <sub>17</sub> Cl <sub>3</sub> FeN <sub>3</sub> O <sub>2</sub> | C <sub>20</sub> H <sub>17</sub> Cl <sub>4</sub> FeN <sub>4</sub> O <sub>2</sub> Se | C <sub>20</sub> H <sub>17</sub> Cl <sub>4</sub> FeN <sub>4</sub> O <sub>2</sub> Se |
| <i>M</i> <sub>r</sub>                                       | 552.45                                                                          | 621.99                                                                             | 621.99                                                                             |
| Crystal system                                              | Monoclinic                                                                      | Monoclinic                                                                         | Monoclinic                                                                         |
| Space group                                                 | <i>P</i> 2 <sub>1</sub> / <i>c</i>                                              | <i>P</i> 2 <sub>1</sub> / <i>n</i>                                                 | <i>P</i> 2 <sub>1</sub> / <i>n</i>                                                 |
| <i>T</i> / K                                                | 293(1)                                                                          | <b>100(1)</b>                                                                      | <b>200(1)</b>                                                                      |
| <i>a</i> / Å                                                | 9.3482(3)                                                                       | 8.3908(2)                                                                          | 8.4121(3)                                                                          |
| <i>b</i> / Å                                                | 9.4215(2)                                                                       | 22.2708(6)                                                                         | 23.8983(6)                                                                         |
| <i>c</i> / Å                                                | 25.8019(8)                                                                      | 12.6870(4)                                                                         | 12.1560(4)                                                                         |
| $\alpha$ / °                                                | 90                                                                              | 90                                                                                 | 90                                                                                 |
| $\beta$ / °                                                 | 94.432(2)                                                                       | 103.222(2)                                                                         | 106.571(3)                                                                         |
| $\gamma$ / °                                                | 90                                                                              | 90                                                                                 | 90                                                                                 |
| <i>V</i> / Å <sup>3</sup>                                   | 2265.68(11)                                                                     | 2307.97(11)                                                                        | 2344.02(13)                                                                        |
| <i>Z</i>                                                    | 4                                                                               | 4                                                                                  | 4                                                                                  |
| $\lambda$ / Å                                               | 1.54186                                                                         | 1.54186                                                                            | 1.54186                                                                            |
| Abs. correction                                             | Multi-scan, LANA                                                                | Multi-scan, LANA                                                                   | Multi-scan, LANA                                                                   |
| $\mu$ / mm <sup>-1</sup>                                    | 10.954                                                                          | 11.537                                                                             | 11.360                                                                             |
| Crystal size / mm                                           | 0.18 × 0.14 × 0.12                                                              | 0.12 × 0.05 × 0.04                                                                 | 0.25 × 0.05 × 0.04                                                                 |
| $\rho_{\text{calc}}$ / g·cm <sup>-3</sup>                   | 1.620                                                                           | 1.790                                                                              | 1.762                                                                              |
| <i>S</i>                                                    | 1.037                                                                           | 1.056                                                                              | 1.105                                                                              |
| <i>R</i> <sub>1</sub> [ <i>I</i> > 2 $\sigma$ ( <i>I</i> )] | 0.0414                                                                          | 0.0670                                                                             | 0.0906                                                                             |
| <i>wR</i> <sub>2</sub> [all data]                           | 0.1053                                                                          | 0.1880                                                                             | 0.2605                                                                             |
| CCDC no.                                                    | 2035917                                                                         | 2035918                                                                            | 2035919                                                                            |

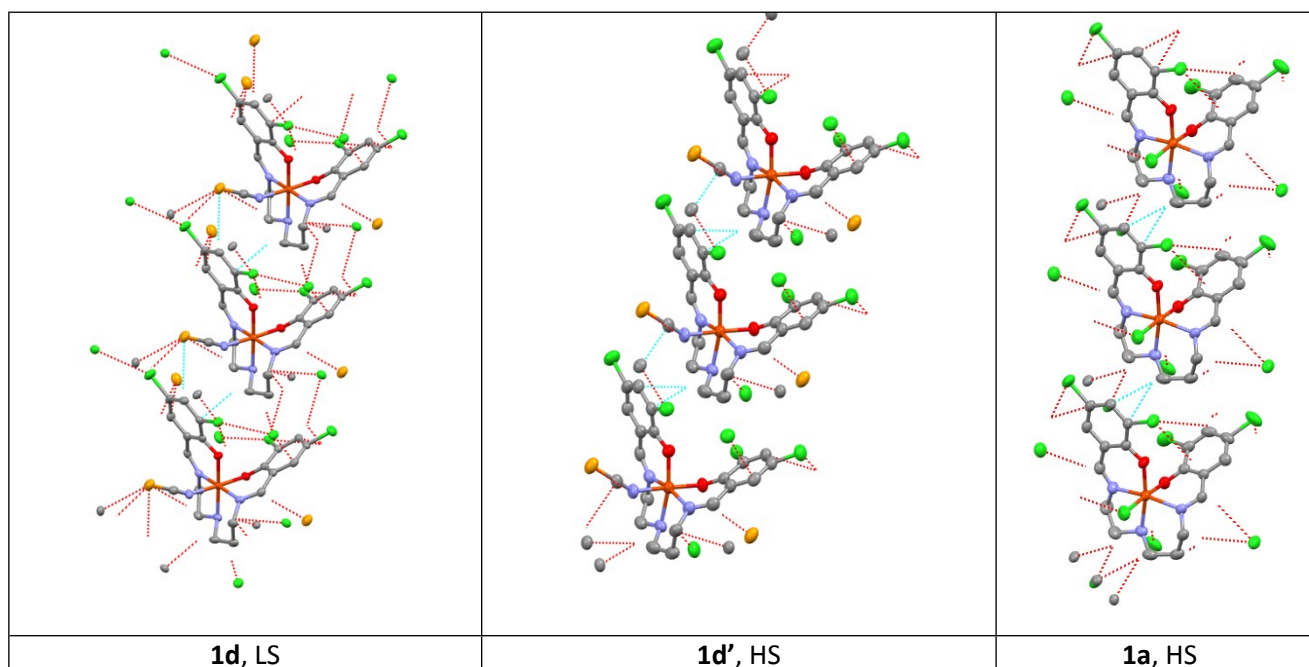

**Fig. S2.** Comparison of intermolecular contacts.

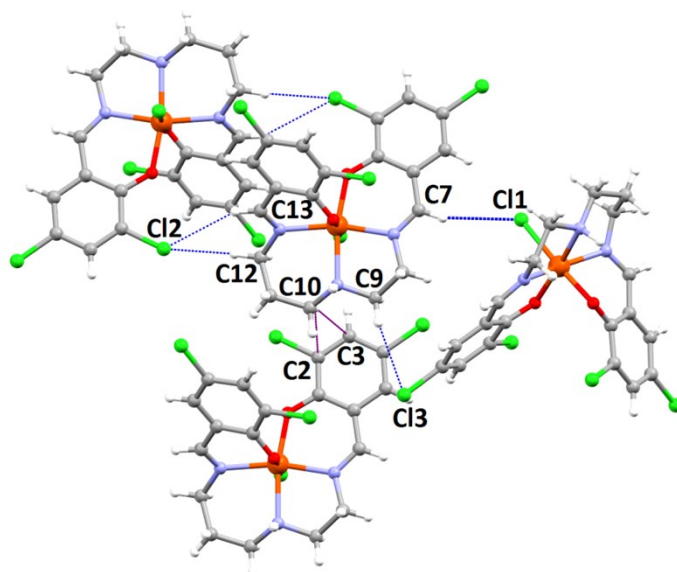

**Fig. S3.** The hydrogen bonding interactions in crystal structure of **1a**.

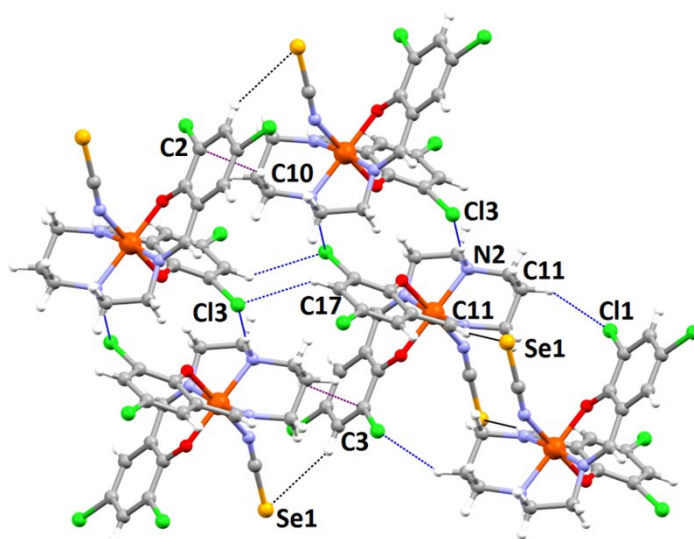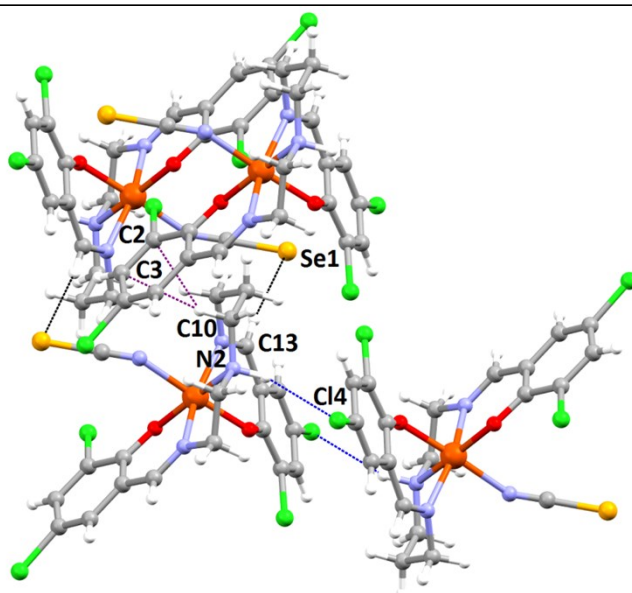

**Fig. S4.** The hydrogen bonding interactions in crystal structure of **LS 1d** at 100 K (top) and **HS 1d'** at 200 K (bottom).

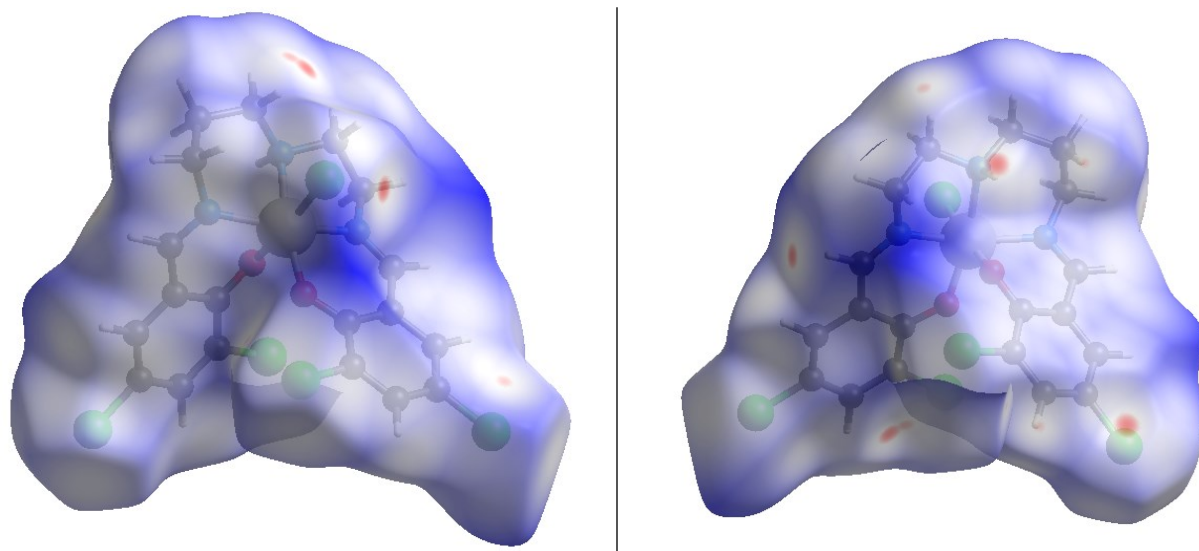

**Fig. S5.** View of the three-dimensional Hirshfeld surface of **1a** plotted over  $d_{\text{norm}}$  in the range -0.0780 to 1.8739 a.u.

---

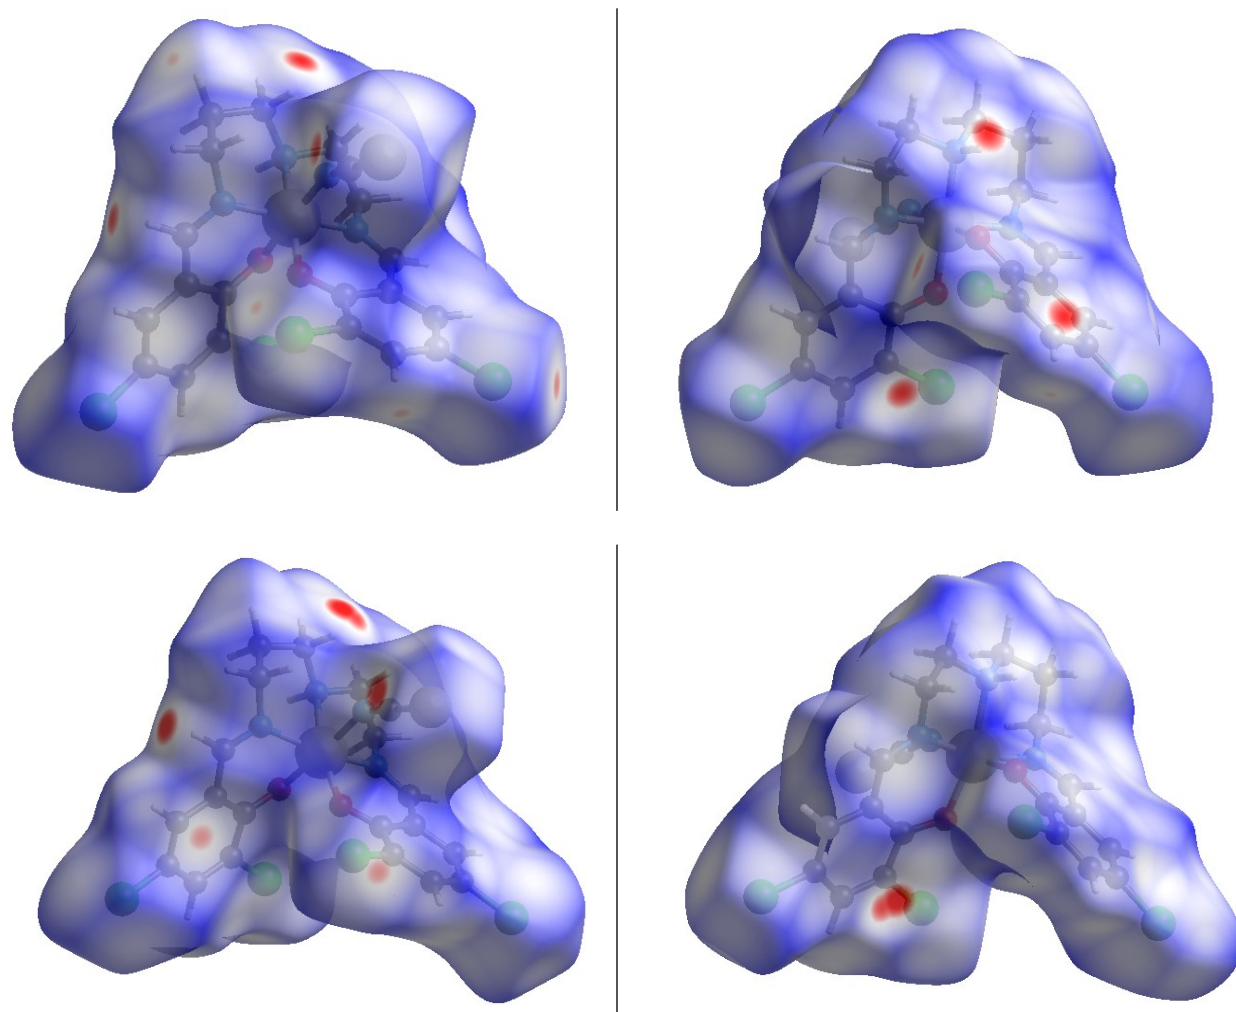

**Fig. S6.** View of the three-dimensional Hirshfeld surface of **1d** plotted over  $d_{\text{norm}}$  in the range -0.0780 to 1.8739 a.u. LS at 100 K (top) and HS at 200 K (bottom).

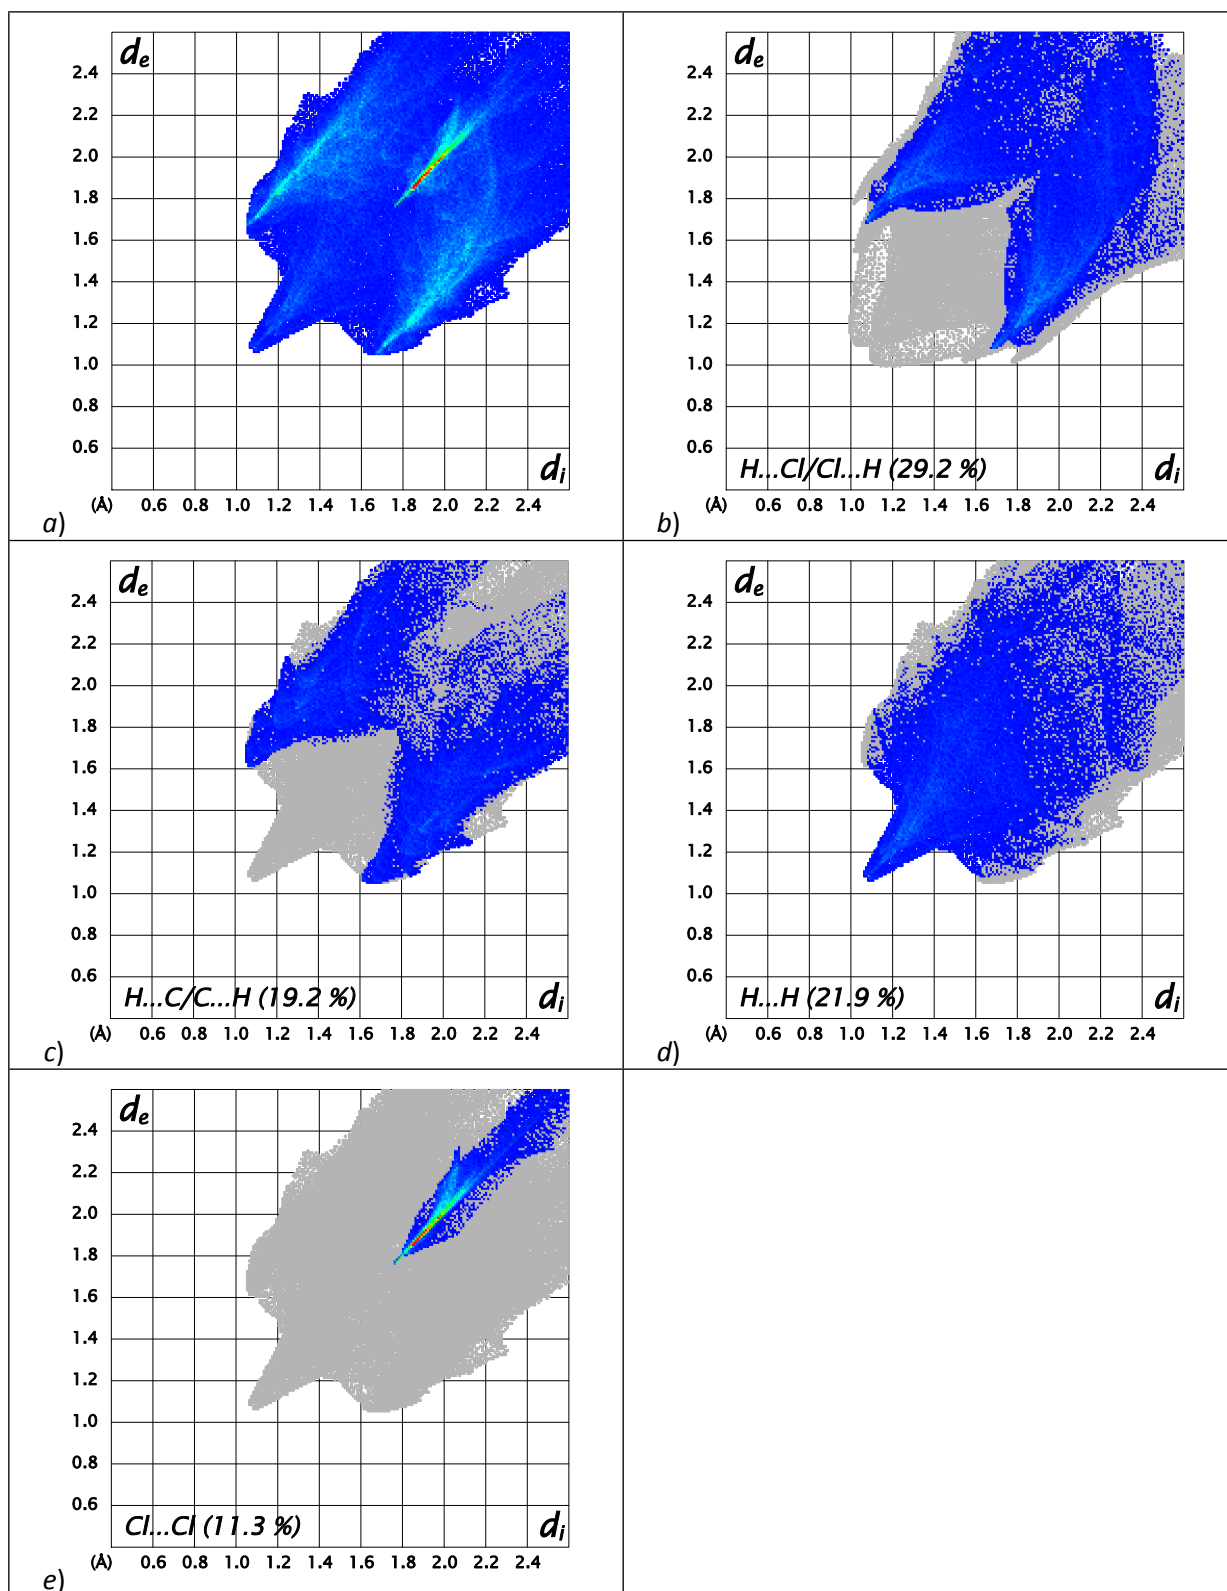

**Fig. S7.** The full two-dimensional fingerprint plots of **1a**, showing (a) all interactions, (b)  $H...C/Cl...H$ , (c)  $H...C/C...H$ , (d)  $H...H$ , and (e)  $Cl...Cl$  interactions. The  $d_i$  and  $d_e$  values are the closest internal and external distances from given on the Hirshfeld surface contacts.

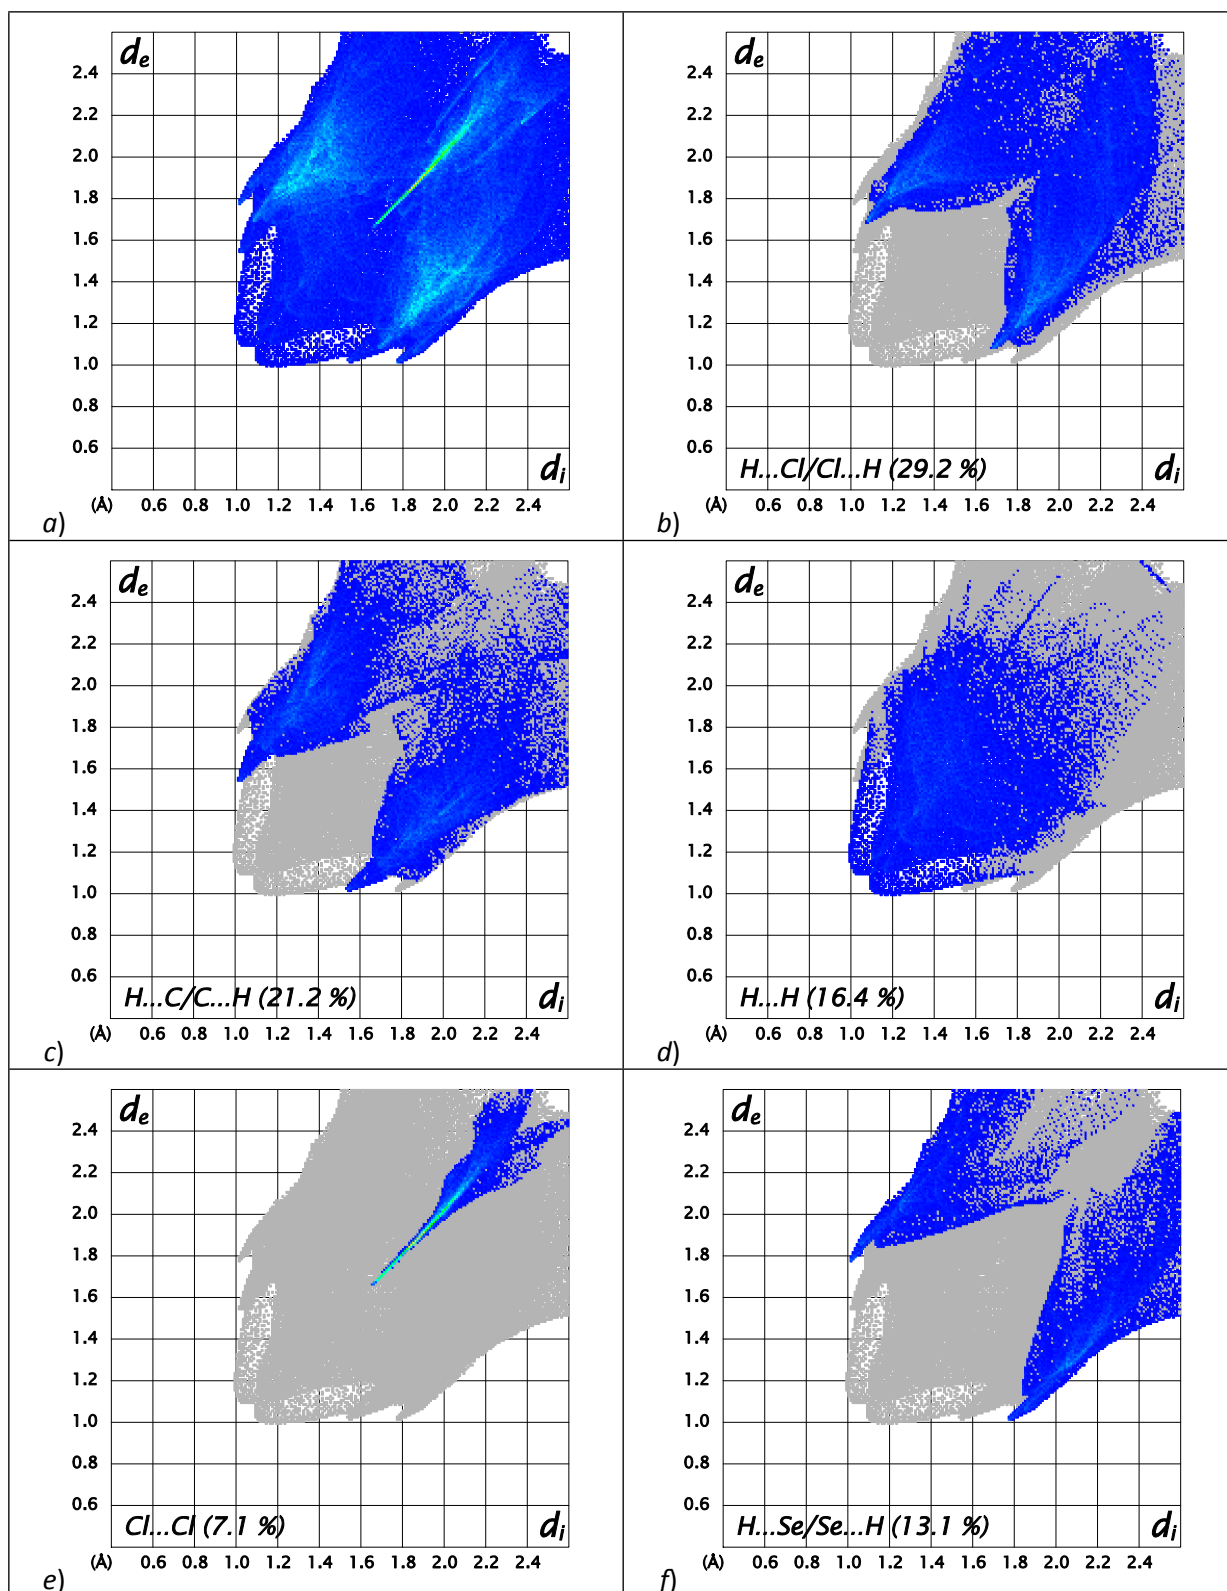

**Fig. S8.** The full two-dimensional fingerprint plots of **1d** at 100 K, showing (a) all interactions, (b)  $H\cdots C/Cl\cdots H$  29.2%, (c)  $H\cdots C/C\cdots H$  21.2%, (d)  $H\cdots H$  16.4%, (e)  $Cl\cdots Cl$  7.1%, and (f)  $H\cdots Se/Se\cdots H$  13.1% interactions. The  $d_i$  and  $d_e$  values are the closest internal and external distances from given on the Hirshfeld surface contacts.

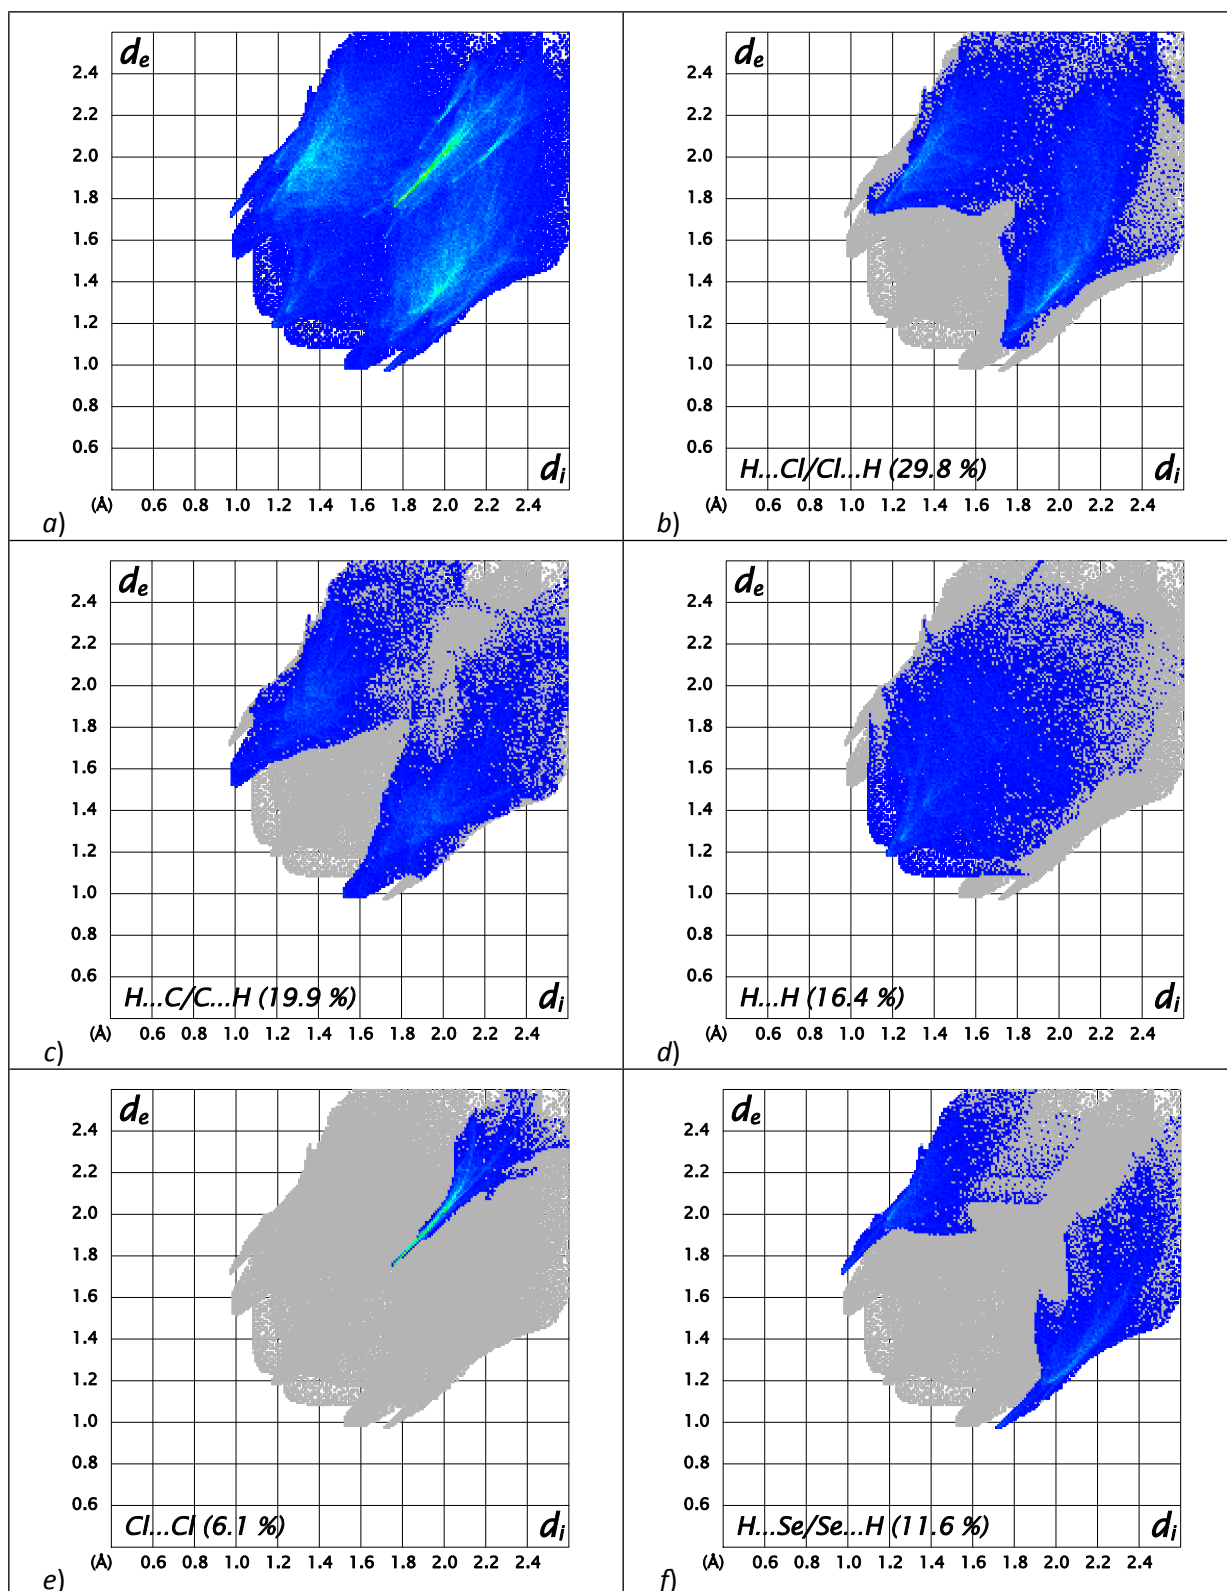

**Fig. S9.** The full two-dimensional fingerprint plots of **1d'** at 200 K, showing (a) all interactions, (b)  $H\cdots Cl/Cl\cdots H$  29.8%, (c)  $H\cdots C/C\cdots H$  19.9%, (d)  $H\cdots H$  16.4%, (e)  $Cl\cdots Cl$  6.1%, and (f)  $H\cdots Se/Se\cdots H$  11.6% interactions. The  $d_i$  and  $d_e$  values are the closest internal and external distances from given on the Hirshfeld surface contacts.



Explanations to Hirshfeld surfaces and fingerprint plots

[M. A. Spackman and D. Jayatilaka, *CrystEngComm*, 2009, **11**, 19]

| Function                                                                                                                     | Symbol and definition                                                                                                | Mapping range                                                                                                |
|------------------------------------------------------------------------------------------------------------------------------|----------------------------------------------------------------------------------------------------------------------|--------------------------------------------------------------------------------------------------------------|
| distance from a point on the surface to the nearest nucleus <i>outside</i> the surface                                       | $d_e$                                                                                                                | red (short distances) through green to blue (long distances)                                                 |
| distance from a point on the surface to the nearest nucleus <i>inside</i> the surface                                        | $d_i$                                                                                                                | red (short distances) through green to blue (long distances)                                                 |
| shape index, $S$ , a measure of “ <i>which</i> ” shape, defined in terms of principal curvatures $\kappa_1$ and $\kappa_2$   | $S = \frac{2}{\pi} \arctan\left(\frac{\kappa_1 + \kappa_2}{\kappa_1 - \kappa_2}\right)$                              | -1.0 (concave) through 0.0 (minimal surface) to +1.0 (convex)                                                |
| curvedness, $C$ , a measure of “ <i>how much</i> ” shape, defined in terms of principal curvatures $\kappa_1$ and $\kappa_2$ | $C = \frac{2}{\pi} \ln\sqrt{\kappa_1^2 + \kappa_2^2}/2$                                                              | -4.0 (flat) through 0.0 (unit sphere) to +0.4 (singular)                                                     |
| normalized contact distance, defined in terms of $d_e$ , $d_i$ and the vdW radii of the atoms                                | $d_{\text{nom}} = \frac{d_i - r_i^{\text{vdW}}}{r_i^{\text{vdW}}} + \frac{d_e - r_e^{\text{vdW}}}{r_e^{\text{vdW}}}$ | red (distances shorter than sum of vdW radii) through white to blue (distances longer than sum of vdW radii) |

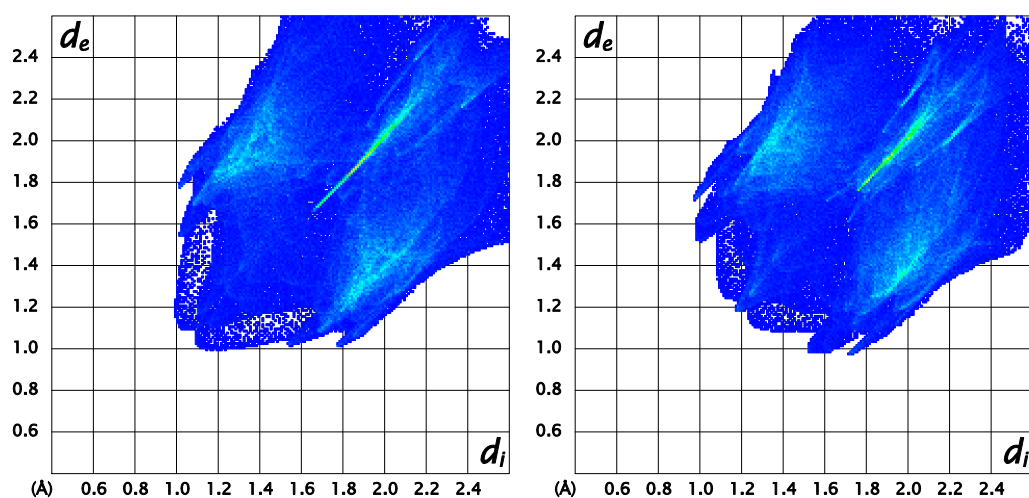

**Fig. S10.** Comparison of the fingerprint plots of all interactions for **1d** 100 K (left) and **1d'** 200 K (right) systems.

- There is a shift of the overall area to higher values on heating.
- Light area with increased histogram (green to red) is moved to higher values.
- Percentage of the critical contacts H-C/C-H, Cl...Cl and H-Se/Se-H decreases on heating:

| Contacts [%] | 100 K | 200 K |
|--------------|-------|-------|
| H-Cl/Cl-H    | 29.2  | 29.8  |
| H-C/C-H      | 21.2  | 19.9  |
| H...H        | 16.4  | 16.4  |
| Cl...Cl      | 7.1   | 6.1   |
| H-Se/Se-H    | 13.1  | 11.6  |
| other        | 13    | 16.2  |
| sum [%]      | 87    | 83.8  |

**Magnetic data**

SQUID magnetometer (Quantum Design, MPMS-XL7) was used in the magnetic data taking: temperature dependence of the magnetic susceptibility, and field dependence of the magnetization; RSO mode of the data acquisition at  $B_{DC} = 0.1$  T was used. A correction to the underlying diamagnetism was applied to raw magnetic data. They were transformed to the temperature dependence of the effective magnetic moment, and the field dependence of the magnetization per formula unit.

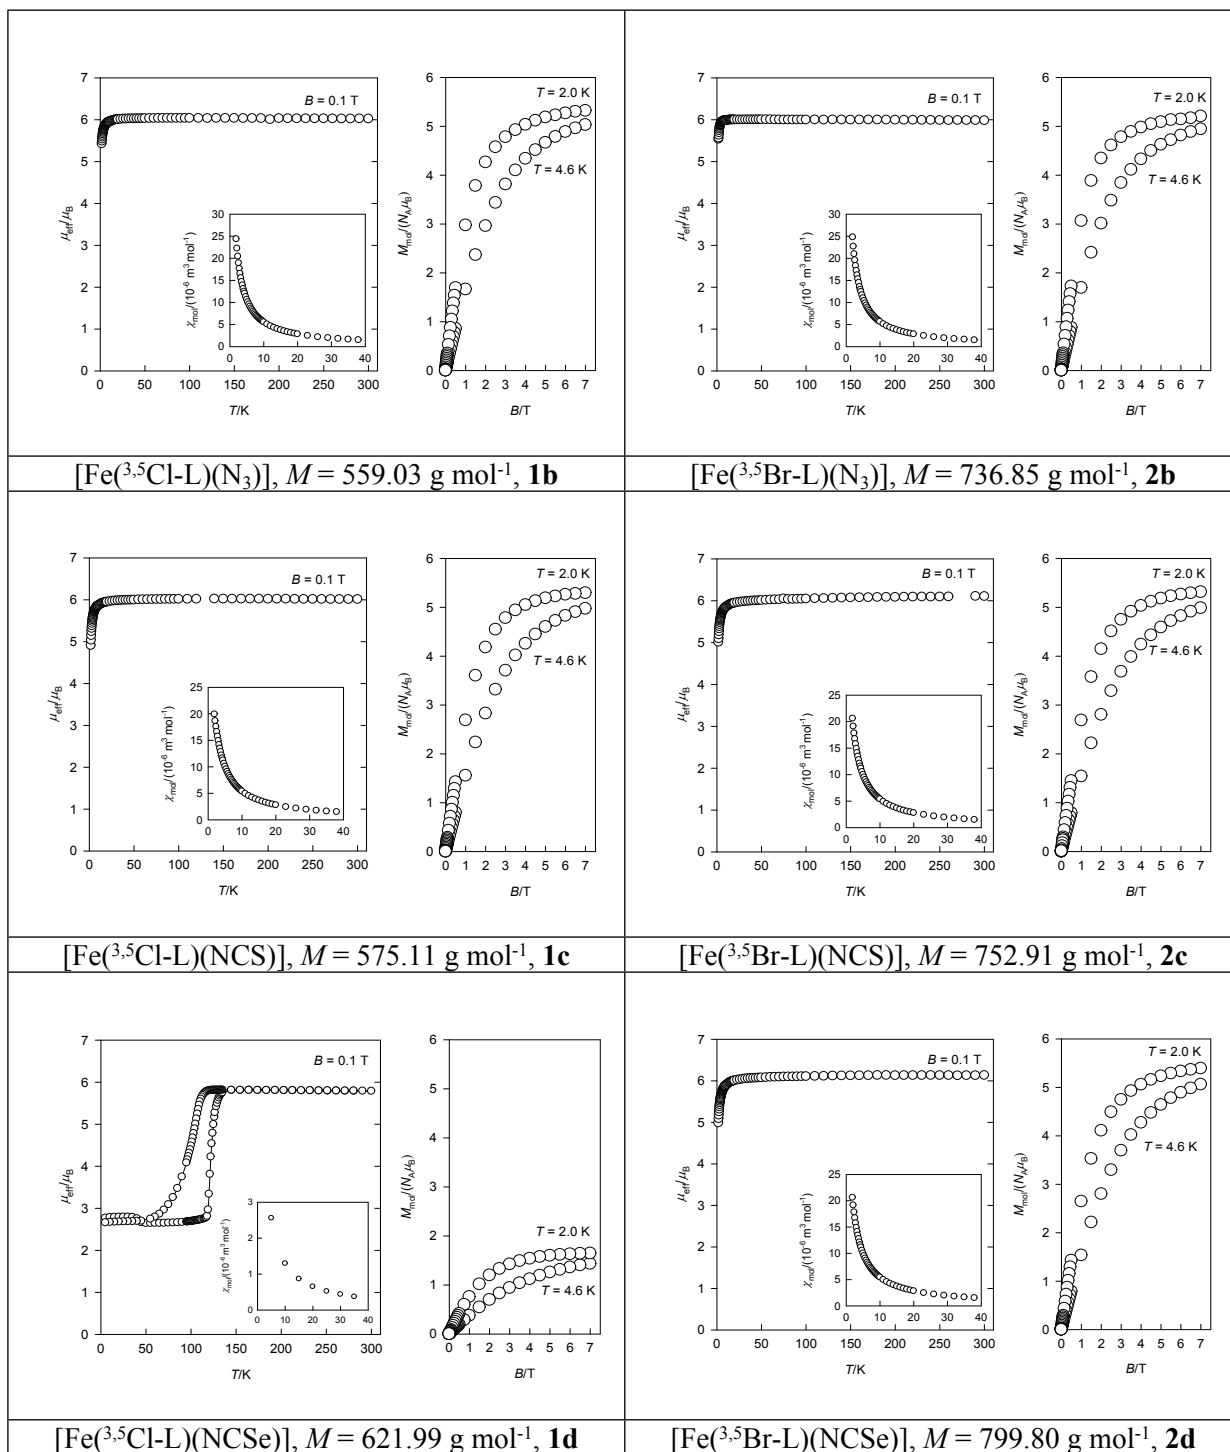

**Fig. S11.** Magnetic functions for the high spin complexes of  $[\text{Fe}^{(3,5)\text{X-L}}(\text{Y})]$  type.

Temperature dependence of the magnetic susceptibility has been a subject of the fitting to an Ising/like model of spin crossover with vibrations. In fitting the magnetic data some assumptions have been made. (i) The low-spin state of Fe(III) is well described by the Curie-Weiss law enlarged by the temperature-independent (van Vleck) term. The free parameters are the  $g_L$ -factor, the Weiss constant  $\Theta_L$ , and  $\alpha_L$ . (ii) The same holds true for the high-spin state, however one can safely fix  $g_H = 2.0$  and omit  $\Theta_H$  and  $\alpha_H$ . (iii) There is nothing like a paramagnetic impurity for the Fe(III) complex (as opposite to a frequent situation for Fe(II) ones). The fourth assumption postulates a model of the spin crossover. This model contains four parameters: (i) the energy difference between LS and HS state  $\Delta_{\text{eff}}$  that is proportional to the enthalpy of the spin transition  $\Delta H = R \cdot E$ ; (ii) the solid-state cooperativeness  $J$  (not to be confused with the exchange coupling constant); (iii) two averaged vibrational frequencies (in fact the Einstein modes) that enter the vibrational partition function. In such a model the equation

$$\langle \sigma \rangle_T = \frac{F-1}{F+1} \quad (\text{S1})$$

with

$$f = \exp[-(E - kT \ln r_{\text{eff}}^T - 2\Gamma \langle \sigma \rangle_T) / kT] \quad (\text{S2})$$

is to be iterated in order to achieve a selfconsistency. The high-spin mole fraction is related to an fictitious spin *via*  $x_H = (1 + \langle \sigma \rangle_T) / 2$ ; the entropic factor is

$$r_{\text{eff}}^T = \frac{g_H^{\text{el}} \left[ \frac{1 - \exp(h\bar{\nu}_L / kT)}{1 - \exp(h\bar{\nu}_H / kT)} \right]^m}{g_H^{\text{el}}} \quad (\text{S3})$$

for  $m = 15$  active modes in a hexacoordinate complex,  $h\bar{\nu}_H$  and  $h\bar{\nu}_L$  – averaged vibration energies. The transition entropy is then  $\Delta S = R r_{\text{eff}}^T \Big|_{x_H=1/2}$ . To this end the equilibrium constant is calculated as  $K = x_H(1 - x_H)$  and this can be used in generating the van't Hoff plot  $\ln K$  vs  $T^{-1}$ .

The model can be modified by considering a frozen portion of the HS-fraction (equivalent to the fixed paramagnetic impurity  $x_{\text{PI}}$ ). In such a case the  $g_{\text{LS}}$  is much closer to the spin-only value, typically  $g_{\text{LS}} = 2.2 - 2.3$ . The resulting thermodynamic parameters of the spin crossover such as  $\Delta H$ ,  $\Delta S$ ,  $T_c$  and  $\Gamma$  are almost the same.

The data fitting has been done using the program MIF&FIT [R. Boča, Program MIF with FIT module. University of SS Cyril and Methodius, Trnava, © 2019].

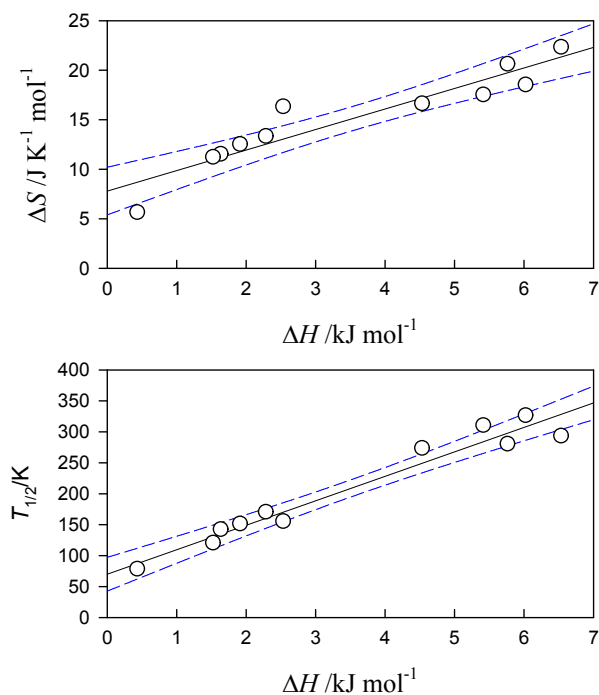

**Fig. S12.** Correlation of thermodynamic parameters for the spin crossover compounds.

**Table S3.** Thermodynamic parameters for mutually related Fe(III) spin crossover complexes. <sup>a</sup>

|    | Compound                                                     | $T_{1/2}$<br>/K                     | $\Delta T_{1/2}$<br>/K | $\Delta H$<br>/kJ mol <sup>-1</sup> | $\Delta S$<br>/J K <sup>-1</sup> mol <sup>-1</sup> | ( $\Gamma/k_B$ )<br>/K | Ref.      |
|----|--------------------------------------------------------------|-------------------------------------|------------------------|-------------------------------------|----------------------------------------------------|------------------------|-----------|
| 1  | [Fe( <sup>3</sup> EtO- <i>saldet</i> )(NCS)]                 | 84 <sup>↑</sup> , 82 <sup>↓</sup> * | 2                      | 0.98;<br>2.07                       | 11.8;<br>5.0                                       | 90                     | S5        |
| 2  | [Fe( <sup>3,5</sup> Cl- <i>salpet</i> )(NCSe)], <b>1d</b>    | 123 <sup>↑</sup> , 99 <sup>↓</sup>  | 24                     | 2.03                                | 17.6                                               | 153                    | This work |
| 3  | [Fe( <sup>5</sup> Br- <i>salpet</i> )(N <sub>3</sub> )]·MeOH | 142                                 |                        | 1.64                                | 11.5                                               | 76                     | S1        |
| 4  | [Fe( <sup>5</sup> Cl- <i>salpet</i> )(NCS)]                  | 280                                 |                        | 5.77                                | 20.6                                               | 180                    | S2        |
| 5  | [Fe( <sup>5</sup> Cl- <i>salpet</i> )(NCSe)]                 | 293                                 |                        | 6.54                                | 22.3                                               | 197                    | S2        |
| 6  | [Fe( <sup>5</sup> Br- <i>salpet</i> )(NCSe)]                 | 326                                 |                        | 6.03                                | 18.5                                               | 215                    | S1        |
| 7  | [Fe( <sup>5</sup> Cl- <i>saldpt</i> )py]BPh <sub>4</sub>     | 78                                  |                        | 0.44                                | 5.61                                               | 63                     | S3        |
| 8  | [Fe( <sup>3</sup> MeO- <i>saldpt</i> )py]BPh <sub>4</sub>    | 273                                 |                        | 4.54                                | 16.6                                               | 90                     | S3        |
| 9  | [Fe( <i>saldpt</i> )py]BPh <sub>4</sub>                      | 310                                 |                        | 5.42                                | 17.5                                               | 150                    | S3        |
| 10 | [Fe( <i>saldpt</i> )( <i>atz</i> )]                          | 416                                 |                        | 15.3                                | 36.8                                               | 284                    | S6        |
| 11 | [Fe( <i>napet</i> )(N <sub>3</sub> )]                        | 122 <sup>↑</sup> , 117 <sup>↓</sup> | 5                      | 1.53                                | 11.2                                               | 99                     | S4        |
| 12 | [Fe( <i>napet</i> )(NCS)]·MeCN                               | 151                                 |                        | 1.92                                | 12.5                                               | 87                     | S4        |
| 13 | [Fe( <i>napet</i> )(NCO)]                                    | 155                                 |                        | 2.54                                | 16.3                                               | 102                    | S4        |
| 14 | [Fe( <i>napet</i> )(NCSe)]·MeCN                              | 170                                 |                        | 2.29                                | 13.3                                               | 99                     | S4        |
| 15 | [Fe( <i>napet</i> )(NCS)]                                    | 174                                 |                        | 3.08;<br>0.90                       | 17.1;<br>5.0                                       | 135                    | S5        |
| 16 | [Fe( <i>napet</i> )(NCS)]·MEK                                | 84                                  |                        |                                     |                                                    |                        | S7        |
| 17 | [Fe( <i>napet</i> )(NCS)]·DMF                                | 235 <sup>↑</sup> , 232 <sup>↓</sup> | 3                      |                                     |                                                    |                        | S7        |
| 18 | [Fe( <i>napet</i> )(NCS)]·DMSO                               | 138 <sup>↑</sup> , 127 <sup>↓</sup> | 11                     |                                     |                                                    |                        | S7        |
| 19 | [Fe( <i>napet</i> )(NCSe)]·DMF                               | 244                                 |                        |                                     |                                                    |                        | S7        |

<sup>a</sup> Abbreviations for petadentate ligands:

H<sub>2</sub>(<sup>3</sup>EtO-*saldet*) = N,N'-bis(3-ethoxy-2-hydroxybenzylidene)-1,5-diamino-3-azapentane),

H<sub>2</sub>(<sup>5</sup>Cl-*salpet*) = N,N'-bis(5-chloro-2-hydroxybenzylidene)-1,6-diamino-3-azahexane),

H<sub>2</sub>(<sup>3,5</sup>Cl-*salpet*) = N,N'-bis(3,5-di-chloro-2-hydroxybenzylidene)-1,6-diamino-3-azahexane),

H<sub>2</sub>(*napet*) = N,N'-bis(2-hydroxynaphthylidene)-1,6-diamino-3-azahexane,

H<sub>2</sub>(*saldpt*) = N,N'-bis(2-hydroxybenzylidene)-1,7-diamino-4-azaheptane,

H<sub>2</sub>(<sup>5</sup>Cl-*saldpt*) = N,N'-bis(5-chloro-2-hydroxybenzylidene)-1,7-diamino-4-azaheptane,

H<sub>2</sub>(<sup>3</sup>MeO-*saldpt*) = N,N'-bis(3-methoxy-2-hydroxybenzylidene)-1,7-diamino-4-azaheptane,

Hatz = 5-aminotetrazole.

### References to Table S3

- S1 C. Krüger, P. Augustín, E. Dlháň, J. Pavlik, J. Moncol, I. Nemeč, R. Boča, F. Renz, *Polyhedron*, 87(2015) 194.
- S2 C. Krüger, P. Augustín, I. Nemeč, Z. Trávníček, H. Oshio, R. Boča, F. Renz, *Eur. J. Inorg. Chem.* (2013) 902.
- S3 R. Boča, Y. Fukuda, M. Gembický, R. Herchel, R. Jaroščíak, W. Linert, F. Renz, J. Yuzurihara, *Chem. Phys. Lett.* 325 (2000) 411.
- S4 I. Nemeč, R. Herchel, R. Boča, Z. Trávníček, I. Svoboda, H. Fuess, W. Linert, *Dalton Trans.* 40 (2011) 10090.
- S5 P. Masárová, P. Zoufalý, J. Moncol, I. Nemeč, J. Pavlik, M. Gembický, Z. Trávníček, R. Boča, I. Šalitrš, *New. J. Chem.* 39 (2015) 508.
- S6 R. Herchel, Z. Trávníček, *Dalton Trans.* 42 (2013) 16279.
- S7 I. Nemeč, R. Herchel, Z. Trávníček, *Dalton Trans.* 44 (2015) 4474.

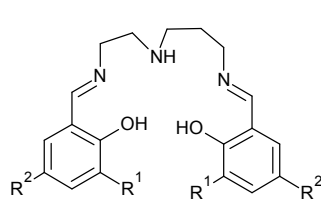

H<sub>2</sub>(<sup>3</sup>R<sup>1</sup>,<sup>5</sup>R<sup>2</sup>-*salpet*)

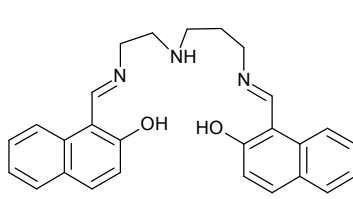

H<sub>2</sub>(*napet*)

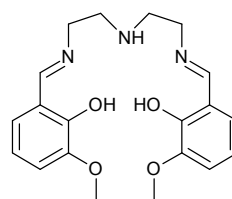

H<sub>2</sub>(<sup>3</sup>EtO-*saldet*)
